# Supplementary material for: Detection of Bovine Antibodies against a Conserved Capsid Epitope as the Basis of a Novel Universal Serological Test for Foot-and-Mouth Disease
Source: PubMed Central journal article supplement (PMC7269384; doi:10.1128/jcm.01527-19), 2020-05-26
Supplement: JCM.01527-19-s0001.pdf [file JCM.01527-19-s0001.pdf]

## Supplementary figures

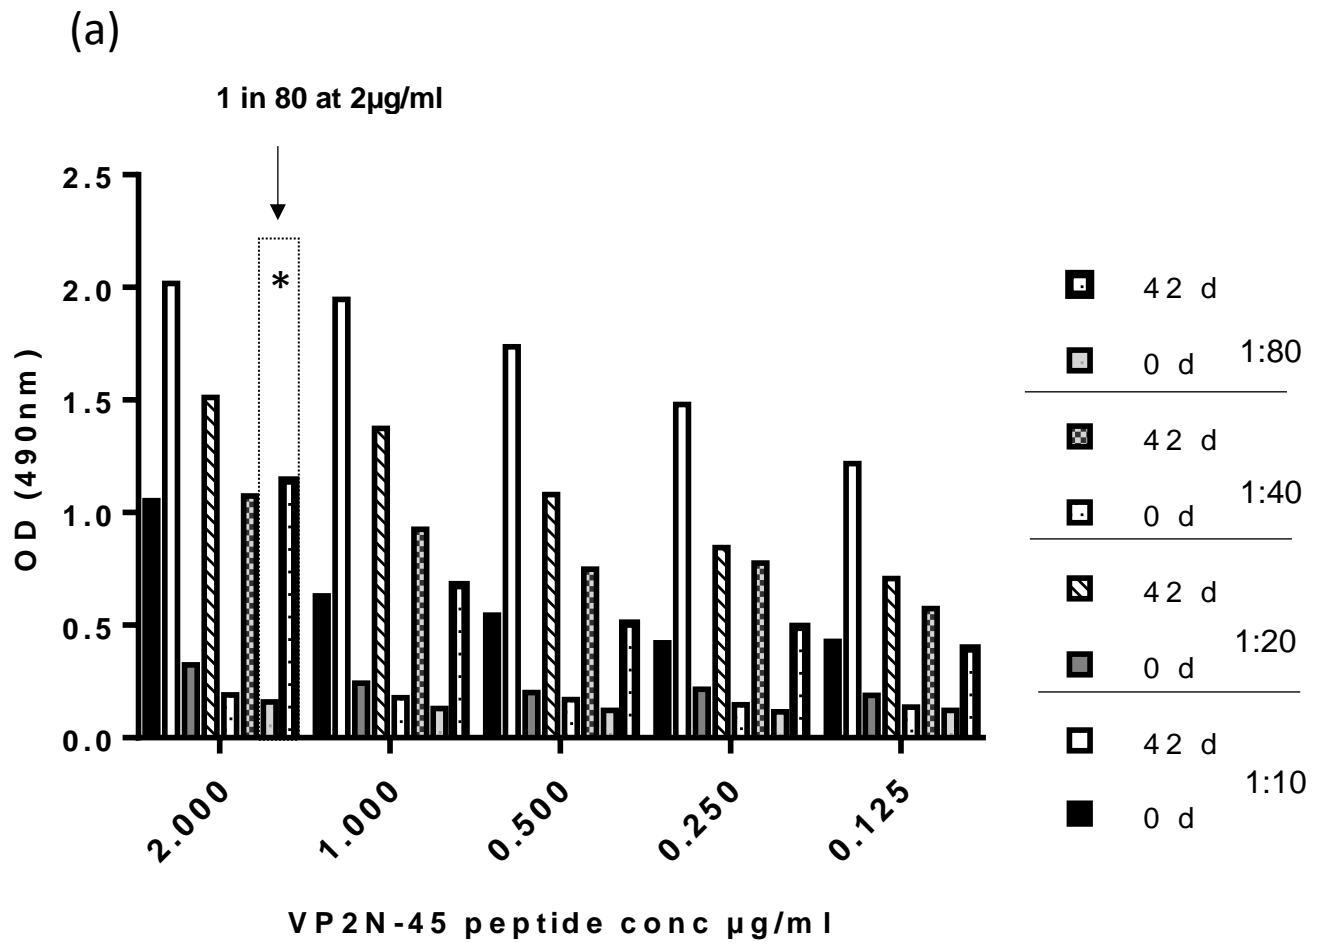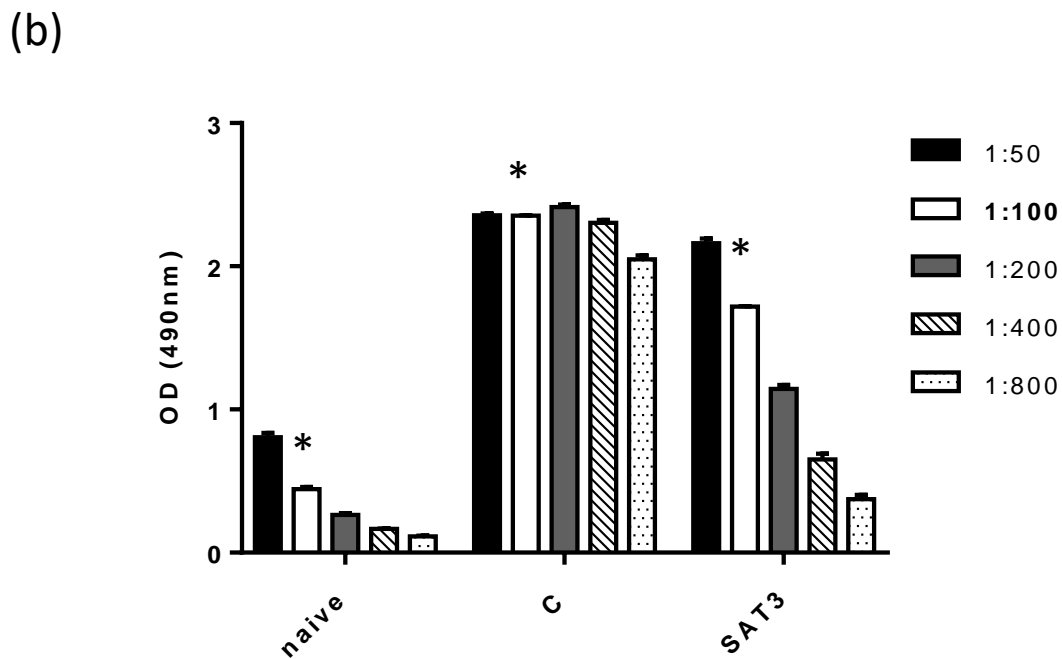

**Fig S1. Optimisation of the peptide ELISA using different concentrations of peptide and dilution of the serum of serotype O from infected animal.** (a) Checkerboard ELISA with negative (0 d) and positive (42 d) sera diluted from 1:10 to 1:80 (as shown in key) and with peptide concentration in the range 0.125-2 $\mu$ g/ml. The optimal conditions for signal to background are highlighted with a box (2 $\mu$ g/ml of peptide and 1 in 80 serum dilution). (b) Reactivity with VP2N45 peptide at 2 $\mu$ g/ml of different dilutions of a strong responder serum sample (type C) and a weak responder serum sample (type SAT3). The asterisk denotes the best conditions of peptide at 2 $\mu$ g/ml and sera diluted 1:100.

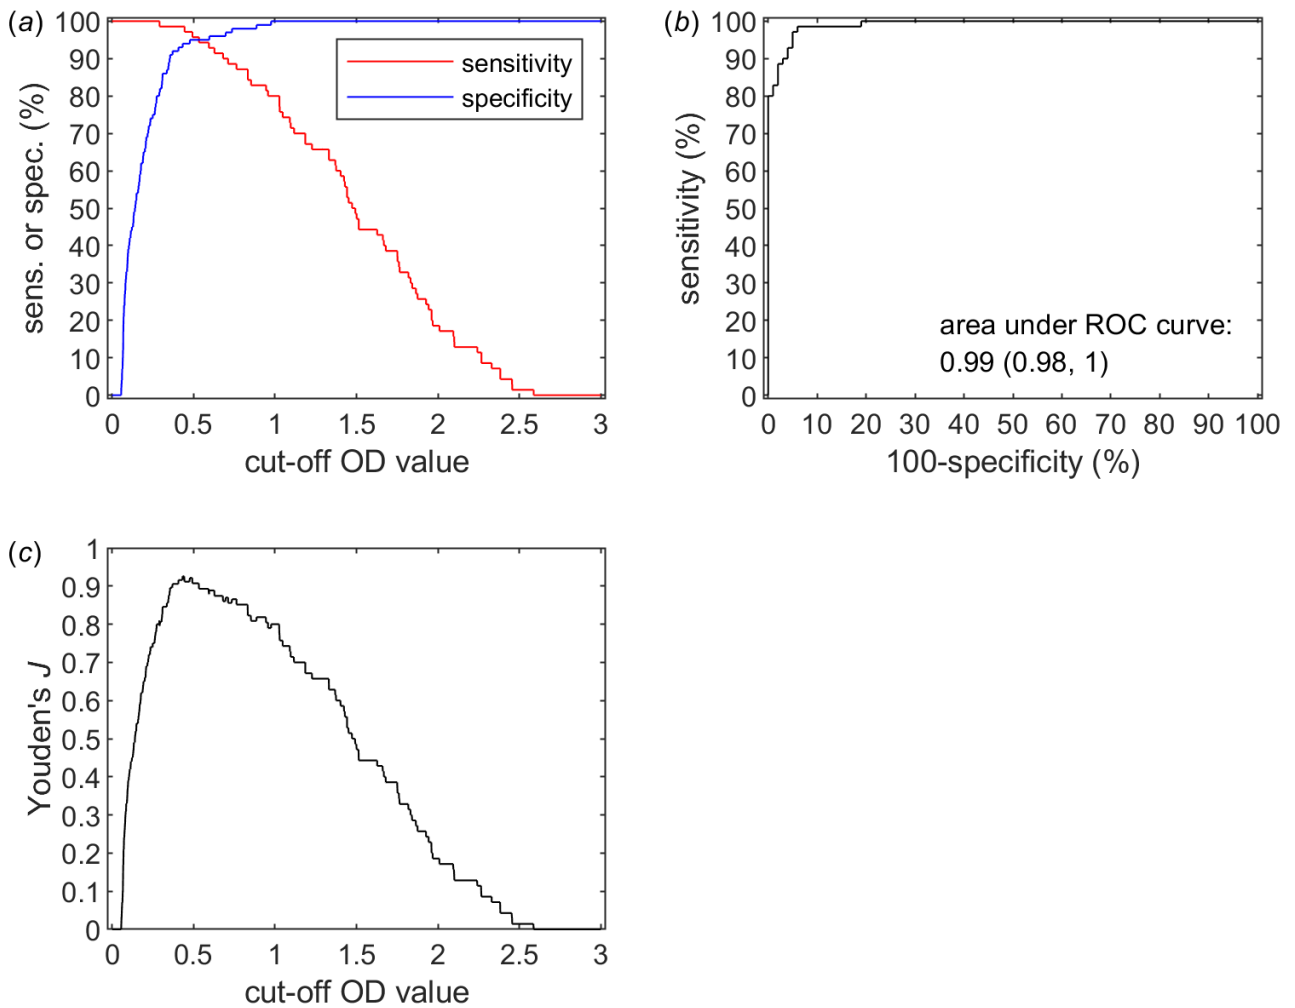

**Fig S2.** Receiver operating characteristic (ROC) analysis to determine the cut off value for the VP2 ELISA. (a) Sensitivity and specificity of the VP2 ELISA at different cut-offs. (b) Empirical ROC curve for the VP2 ELISA. The area under the curve is a measure of the discriminatory power of the test (with one corresponding to perfect discrimination). (c) Youden's  $J$  (sensitivity+specificity-1) as a function of cut-off for the VP2 ELISA. This measures the probability of making an informed decision, with the cut-off being that which maximises  $J$  (in this 0.43) (Greiner et al., 2000).
